# Transforming Growth Factor $\beta$ Signaling Pathway Associated Gene Polymorphisms May Explain Lower Breast Cancer Risk in Western Indian Women

Narendra N. Joshi<sup>1\*</sup>, Mithila D. Kale<sup>1</sup>, Sujata S. Hake<sup>1</sup>, Sadhana Kannan<sup>2</sup>

**1** Cancer Research Institute, Advanced Centre for Treatment, Research and Education in Cancer (ACTREC), Tata Memorial Centre (TMC), Kharghar, Navi Mumbai, India, **2** Epidemiology and Clinical Trials Unit - Clinical Research Centre, Advanced Centre for Treatment, Research and Education in Cancer (ACTREC), Tata Memorial Centre (TMC), Kharghar, Navi Mumbai, India

## Abstract

Transforming growth factor  $\beta 1$  (*TGFB1*) T29C and TGF  $\beta$  receptor type 1 (*TGFBRI*) 6A/9A polymorphisms have been implicated in the modulation of risk for breast cancer in Caucasian women. We analyzed these polymorphisms and combinations of their genotypes, in pre menopausal breast cancer patients (N=182) and healthy women (N=236) from western India as well as in breast cancer patients and healthy women from the Parsi community (N=48 & 171, respectively). Western Indian women were characterized by a higher frequency of *TGFB1*\*C allele of the TGF  $\beta$  T29C polymorphism (0.48 vs 0.44) and a significantly lower frequency of *TGFBRI*\*6A allele of the *TGFBRI* 6A/9A polymorphism (0.02 vs 0.068,  $p < 0.01$ ) as compared to healthy Parsi women. A strong protective effect of *TGFB1*\*29C allele was seen in younger western Indian women (<40 yrs; OR=0.45, 95% CI 0.25–0.81). Compared to healthy women, the strikingly higher frequencies of low or intermediate TGF  $\beta$  signalers in patients suggested a strong influence of the combination of these genotypes on the risk for breast cancer in Parsi women (for intermediate signalers, OR=4.47 95%CI 1.01–19.69). The frequency of low signalers in Parsi healthy women, while comparable to that reported in Europeans and Americans, was three times higher than that in healthy women from western India (10.6% vs 3.3%,  $p < 0.01$ ). These observations, in conjunction with the low incidence rate of breast cancer in Indian women compared to White women, raise a possibility that the higher frequency of *TGFB1*\*29C allele and lower frequency of *TGFBRI*\*6A allele may represent important genetic determinants that together contribute to a lower risk of breast cancer in western Indian women.

**Citation:** Joshi NN, Kale MD, Hake SS, Kannan S (2011) Transforming Growth Factor  $\beta$  Signaling Pathway Associated Gene Polymorphisms May Explain Lower Breast Cancer Risk in Western Indian Women. PLoS ONE 6(8): e21866. doi:10.1371/journal.pone.0021866

**Editor:** Amanda Ewart Toland, Ohio State University Medical Center, United States of America

**Received:** March 11, 2011; **Accepted:** June 8, 2011; **Published:** August 4, 2011

**Copyright:** © 2011 Joshi et al. This is an open-access article distributed under the terms of the Creative Commons Attribution License, which permits unrestricted use, distribution, and reproduction in any medium, provided the original author and source are credited.

**Funding:** This work was supported by grants from the Department of Biotechnology, Ministry of Science and Technology, Government of India (BT/PR/1317/Med/09/213/98), The Lady Tata Memorial Trust, Women's Cancer Initiative (TMC), and Annual Scientific Fund, ACTREC, TMC. The funders had no role in study design, data collection and analysis, decision to publish, or preparation of the manuscript.

**Competing Interests:** The authors have declared that no competing interests exist.

\* E-mail: njoshi@actrec.gov.in

## Introduction

Germline mutations in various cancer susceptibility genes can account for only around 10% of all breast cancer cases [1]. Thus, the genetic basis of breast cancer in the majority of patients who do not have a family history for malignant disorders remains poorly understood. The influence of common genetic variants on the risk for breast cancer has been suggested by many studies [2,3]. The identification of a number of such variants in recent years highlights the interest and efforts in this direction [4,5]. These efforts could aid in population based screening to identify high risk subjects [6]. In this context, the naturally occurring functional polymorphisms in TGF  $\beta 1$  and TGF  $\beta$  Receptor1 genes have been extensively studied for their influence on the risk for various malignant disorders [4,7–9]. The effect of modulation of TGF  $\beta 1$  expression on the growth of mammary tumors in murine models [10,11], contribution of mutations in genes coding for members of the TGF  $\beta$  signaling pathway to the development or progression of various cancers [12,13], and the association of higher levels of TGF  $\beta 1$  in tumor tissues with lymph node metastases as well as poor prognosis [14,15], all provide a strong rationale for such studies.

In breast cancer patients, *TGFB1* T29C (L10P; rs1800470) and *TGFBRI* 6A/9A remain the two most extensively studied polymorphisms. In *TGFB1* T29C polymorphism, a replacement of Leucine by Proline at position 29 (*TGFB1* codon10 T>C) has been shown to result in an increased secretion of the cytokine [16]. A nine base pair deletion in the repeat sequence of exon 1 of the *TGFBRI* gene, giving rise to the *TGFBRI*\*6A allele [17], was found to result in weaker cytokine induced response compared to the wild type, *TGFBRI*\*9A allele [18]. The hypomorphic behavior of this allele was also reflected in its association with weaker radiation induced response of lymphocytes [19]. Moreover, the allele has been implicated in TGF  $\beta$  independent enhancement of migration and invasion of MCF-7 cells [20].

With regard to the risk for breast cancer, it has been proposed that the presence of *TGFB1*29\*C allele that is associated with higher production of the cytokine, would provide protection in the initial stages by virtue of its anti-proliferative action on mammary epithelial cells but would enhance the risk at later stages by promoting invasion as well as spread of the disease [21]. Findings of the Breast Cancer Association Consortium, the only large scale study that has clearly addressed this possibility, favor such a

hypothesis and place those with *TGFBI\*CC* genotype at a higher risk of the disease [4]. Similar observations have been reported in studies on European women [16]. Two recent meta analyses of studies on population based controls [7,8] also arrived at the same conclusion. On the other hand, some studies have failed to detect any association [22–25] or have reported a weak protective influence of *TGFBI\*CC* genotype in older American women and pre menopausal Japanese women [26,27]. Probable age and ethnicity related variations within and across the study populations are thought to be responsible for the discordant data. Similar considerations may also explain the discordance between the findings of various studies examining the influence of *TGFBRI 6A/9A* polymorphism on the risk for breast cancer [18,24,25,28,29]. However, a recent meta analysis supported the increased breast cancer risk in women positive for the *TGFBRI\*6A* allele [9]. The trend of disagreement between observations from different studies also extends to the study of the influence of the combined effect of genotypes of these polymorphisms on the risk for breast cancer. The larger impact of combinations of genotypes that result in weak cytokine signaling leading to increased risk for the disease as observed by Kaklamani *et al* [30], was not detected in two other studies [24,25] suggesting a need for additional studies with larger cohorts.

Population based data regarding these polymorphisms in Indian women remains limited [31,32]. The increasing incidence of breast cancer in the Indian subcontinent, especially in the younger age group [33], emphasizes the need for studies addressing the genetic basis of risk for breast cancer in the population. Further, over forty percent of breast cancer patients in India are diagnosed at age  $\leq 45$  years as against fifteen percent patients in western countries, an observation supported by the trends reported in a recent study [34]. We therefore examined the influence of TGF β1 T29C and *TGFBRI 6A/9A* gene polymorphisms in pre menopausal women from western India. To that effect the study was restricted to Marathi-speaking (Maharashtrian) subjects from Western India, living within 200 km radius around the state-capital city of Mumbai (who constitute 80% of the population of the state of Maharashtra). In parallel, we have studied these polymorphisms in breast cancer patients and healthy women from the Parsi (Zoroastrian) community. Parsis in India represent a geographically isolated community [35]. The advantages of genetic studies in isolated populations have long been recognized [36]. Further, breast cancer is the most common cancer in Parsi women with a 1.5 fold higher age adjusted incidence rate compared to the rate in non-Parsi Indian women [37]. In view of these

considerations, it was of relevance to carry out a parallel study in subjects from these two communities.

The comparison of genotypes in healthy subjects from the two ethnically distinct communities studied, and the comparisons between patients and healthy subjects within each of the groups have revealed novel trends with significant implications. Further, in terms of the influence of high TGF beta1 producing genotype (*TGFBI\*CC*) on the risk for breast cancer, our results reveal trends that are opposite to those reported in Caucasian women. The basis for these observations and their implications has been discussed with due supporting literature.

To our knowledge, this is the first study of *TGFBRI 6A/9A* genotypes in an Indian cohort. Similarly, this study also represents the first report of combined analysis of these two polymorphisms in populations outside the western hemisphere.

## Materials and Methods

### Study Subjects

**Ethics Statement.** This case-control study was carried out with the approval of the ethics committee of the Tata Memorial Hospital, Mumbai. The participants were recruited after obtaining their informed, written consent.

Reproductive health history was collected with an appropriately designed questionnaire. One hundred and eighty two Maharashtra (Marathi-speaking, Hindu) pre menopausal women with confirmed diagnosis of breast cancer treated at the Tata Memorial Hospital during 1999–2005 were recruited within twelve to eighteen months of diagnosis. Lack of family history for malignant disorders could be confirmed for 75% of the cases. Two hundred and thirty six unrelated, healthy premenopausal Maharashtra women without family history for cancer were recruited from the community. Parsi women with breast cancer (N = 48) comprised of those treated in various hospitals in the city. Mean post diagnosis duration for these patients was  $4.8 \pm 4.2$  yrs (Median = 3), with sixty two percent of the patients recruited within five years of diagnosis. Healthy, unrelated Parsi women (N = 171) were recruited from the community. Eight Parsi patients as well as ten healthy women volunteers reported a strong family history for cancer.

The mean age was lower in healthy Maharashtra controls than in patients ( $33.1 \pm 7.5$  and  $39.1 \pm 6.6$ , respectively;  $p < 0.01$ ). The available data indicated comparable age at menarche and age at first child birth in the two groups (Table 1). In Parsi subjects, the mean age of the control group was  $57.1 \pm 9.2$  yrs

**Table 1.** Reproductive health history of the study subjects.

|                            | Maharashtrian Subjects <sup>a,b</sup> |                      | Parsi Subjects <sup>c,e</sup> |                     |
|----------------------------|---------------------------------------|----------------------|-------------------------------|---------------------|
|                            | Controls                              | Patients             | Controls                      | Patients            |
|                            | N = 236                               | N = 182              | N = 171                       | N = 48              |
| Age                        | $33.1 \pm 7.5^{\#}$                   | $39.1 \pm 6.6$       | $57.1 \pm 9.2$                | $50.3 \pm 9$        |
| Age at Menarche            | $13.9 \pm 1.3$ (190)                  | $14.7 \pm 3.5$ (115) | $12.7 \pm 1.6$ (147)          | $12.9 \pm 1.7$ (42) |
| Age at first child – birth | $24.1 \pm 4.7$ (136)                  | $22.7 \pm 3.7$ (90)  | $26.7 \pm 3.9$ (125)          | $26.5 \pm 3.9$ (36) |
| Age at Menopause           | -                                     | -                    | $46.6 \pm 5.0$ (131)          | $46.4 \pm 3.4$ (29) |

<sup>#</sup> (Mean  $\pm$  SD); <sup>^</sup> Numbers in parentheses represent the number of subjects with available information. For patients, age represents age at diagnosis.

<sup>a</sup>) Fifty three healthy subjects and six patients were unmarried; b) A number of young healthy subjects were recently married and hence nulliparous.

<sup>c</sup>) Twenty healthy subjects and ten patients were premenopausal; d) Sixteen healthy subjects and six patients were unmarried; e) Twenty six healthy women and five patients were nulliparous.

doi:10.1371/journal.pone.0021866.t001

while that of patients was  $50.3 \pm 9$  yrs ( $p < 0.01$ ). The age at menarche, first child birth and menopause was similar in the two groups (Table 1).

### Genotyping

Isolation of DNA for genotyping was carried out as described in our earlier report [38]. Genotyping for *TGFBI* T29C polymorphism was performed by PCR-SSP based method, using primers described by Perrey *et al* [39]. Products were analyzed on 1.5% agarose gel stained with ethidium bromide. DNA samples of known genotypes from the *International Histocompatibility Workshop Group* (IHWG) reference panel were used to validate the PCR conditions and as controls in each experiment. Results were further confirmed by DNA sequencing in representative samples. Genomic DNA was amplified using primers, GAGGCCCTCCTACCTTTTG (F) and GCAGCTTGGACAGGATCT (R) as described in the SNP 500 cancer database [http://snp500cancer.nci.nih.gov/sequencing\\_assays.cfm?snp\\_id=TGFBI-01](http://snp500cancer.nci.nih.gov/sequencing_assays.cfm?snp_id=TGFBI-01). The amplified products were sequenced by the standard method using big dye terminator kit (ABI) on 3100AVANT Genetic Analyzer (Applied Biosystems).

For *TGFBR1* 6A/9A genotyping, exon 1 of *TGFBR1* was amplified using primers described by Kaklamani *et al* [30]. Ten microlitres reaction mix contained 50 ng of DNA, 1X PCR buffer (Fermentas), 0.2 mM dNTPs, 1.5 mM Mg<sup>2+</sup>, 10% DMSO, 0.1% BSA and 0.5 units of Taq polymerase (Fermentas) along with 1.0 μM primers. PCR conditions were as follows –95°C for 5 min, 35 cycles of 94°C for 30 s, 65°C for 30 s, 72°C for 30 s, followed by extension at 72°C for 5 min. PCR products (256/247 bp) were analyzed on 2% agarose gel stained with ethidium bromide. The genotypes were also confirmed by running the products on 10% PAGE and by sequencing of representative samples.

### Statistical analysis

Chi-square test was used to find out if the genotype frequencies in controls are in Hardy-Weinberg equilibrium and also to determine the significance of difference in genotype frequencies between different groups. For various comparisons, two sided *p* values were calculated using Fisher's exact test. To estimate the risk for breast cancer, the frequencies of subjects homozygous for the wild type alleles, namely *TGFBI*\*29T and *TGFBR1*\*9A, were taken as reference for the respective polymorphisms. For Maharashtra subjects, the risk was determined after adjusting for age, and was expressed as odds ratio with 95% confidence interval. In each case, the odds ratios were computed for dominant, additive and recessive models. Further, various combinations of genotypes of these two polymorphisms were categorized into high, intermediate and low signalers [30], wherein subjects with *TGFBI*\*CC and *TGFBR1*\*9A/9A genotype combination were identified as high signalers in accordance with the high TGF β levels and strong TGFBR1 activity associated with these genotypes. Individuals homozygous for the allele associated with either higher TGF β levels or with strong signaling (*TGFBI*\*CC or *TGFBR1*\*9A/9A) were grouped as intermediate signalers, and subjects with the remaining combinations constituted low signalers. The risk was estimated for the latter two groups with high signalers as reference. SPSS software (version 15.0) was used for statistical analysis. Power calculations were performed using Quanto [40].

### Results

Two hundred and twenty four healthy controls (95%) and one hundred and sixty (88%) premenopausal breast cancer patients

from the Maharashtra community could be genotyped for the two polymorphisms studied. Similarly, one hundred and sixty (94%) healthy Parsis and forty three Parsi patients (95%) could be genotyped and included in the analysis. The genotype frequencies for the two polymorphisms studied were in agreement with Hardy-Weinberg equilibrium in healthy subjects from both the communities.

### Association of TGF β1 T29C polymorphism with risk for breast cancer

The frequency of the variant allele (*TGFBI*\*29C) in healthy Maharashtra women was higher compared to that in healthy Parsi women (0.48 vs 0.44; Table 2). The differences in genotype frequencies between healthy Maharashtra and Parsi women were not statistically significant. In Parsis, genotype frequencies differed significantly between healthy subjects and patients ( $p = 0.002$ ; Table 2). The higher frequency of *TGFBI*\*TC genotype in Parsi patients was further confirmed by sequencing 50% of the randomly selected samples. The genotype frequencies were also analyzed in different subgroups of Maharashtra patients, based on age at diagnosis (< or ≥40 yrs).

A trend towards a protective effect of *TGFBI*29\*C allele (OR = 0.66; CI, 0.42–1.02) was noted in Maharashtra subjects for the dominant model only (Table 3). In Parsi subjects, the increased risk suggested in carriers of *TGFBI*29\*C allele (dominant model) and a protective influence of the *TGFBI*\*CC genotype recessively, were not statistically significant (Table 3). In younger Maharashtra subjects, (<40 yrs), stronger protection observed in carriers of the *TGFBI*\*29C allele remained unaffected even after adjustment for age (OR = 0.50; CI, 0.27–0.94; Table 4). In the same age group, subjects homozygous for the variant allele were significantly protected compared to those homozygous for the wild

**Table 2.** Frequencies of *TGFBI*T29C and *TGFBR1* 6A/9A genotypes in the study populations.

|                            | Maharashtrian Subjects |              | Parsi Subjects |              |
|----------------------------|------------------------|--------------|----------------|--------------|
|                            | Controls               | Cases        | Controls       | Cases        |
| <b><i>TGFBI</i> T29 C</b>  | <b>N (%)</b>           | <b>N (%)</b> | <b>N (%)</b>   | <b>N (%)</b> |
| TT                         | 61 (27.2)              | 58 (36.2)    | 53 (33.1)      | 9 (20.9)*    |
| TC                         | 109 (48.7)             | 72 (45.0)    | 72 (45.0)      | 32 (74.4)    |
| CC                         | 54 (24.1)              | 30 (18.8)    | 35 (21.9)      | 2 (4.7)      |
| T%                         | 51.6                   | 58.8         | 55.6           | 58           |
| C%                         | 48.4                   | 41.2         | 44.4           | 42           |
| <b><i>TGFBR1</i> 6A/9A</b> | <b>N (%)</b>           | <b>N (%)</b> | <b>N (%)</b>   | <b>N (%)</b> |
| 9A                         | 213 (95.9)             | 163 (97.6)   | 148 (87.6)     | 33 (78.6)    |
| 9A6A                       | 9 (4.1)                | 4 (2.4)      | 19 (11.2)      | 8 (19.0)     |
| 6A                         | 0                      | 0            | 2 (1.2)        | 1 (2.4)      |
| 9A%                        | 98                     | 98.8         | 93.2           | 88.1         |
| 6A%                        | 2**                    | 1.2          | 6.8            | 11.9         |

\* $p < 0.01$  for *TGFBI* T29C genotype frequencies in Parsi healthy controls vs patients.

\*\* $p < 0.01$  for *TGFBR1*\*6A allele frequency in healthy Maharashtra vs Parsi women.

doi:10.1371/journal.pone.0021866.t002

**Table 3.** TGFβ1 T29C polymorphism and risk for breast cancer in Maharashtrian and Parsi women.

|                        | Maharashtrian Subjects |                          |                          | Parsi Subjects |                          |
|------------------------|------------------------|--------------------------|--------------------------|----------------|--------------------------|
|                        | Cases/Controls         | OR <sup>†</sup> (95% CI) | OR <sup>‡</sup> (95% CI) | Cases/Controls | OR <sup>†</sup> (95% CI) |
| Genotype               |                        |                          |                          |                |                          |
| <b>TGFβ1*T29C</b>      |                        |                          |                          |                |                          |
| <i>Dominant Model</i>  |                        |                          |                          |                |                          |
| TT                     | 58/61                  | 1                        | 1                        | 9/53           | 1                        |
| TC/CC                  | 102/163                | 0.66 (0.42-1.02)         | 0.73 (0.46-1.17)         | 34/107         | 1.87 (0.84-4.19)         |
| <i>Additive Model</i>  |                        |                          |                          |                |                          |
| TT                     | 58/61                  | 1                        | 1                        | 9/53           | 1                        |
| TC                     | 72/109                 | 0.69 (0.44-1.11)         | 0.75 (0.46-1.24)         | 32/72          | 2.62 (1.15-5.94)         |
| CC                     | 30/54                  | 0.58 (0.33-1.04)         | 0.68 (0.37-1.26)         | 2/35           | 0.34 (0.07-1.65)         |
| <i>Recessive Model</i> |                        |                          |                          |                |                          |
| TT/TC                  | 130/170                | 1                        | 1                        | 41/125         | 1                        |
| CC                     | 30/54                  | 0.73 (0.44-1.2)          | 0.8 (0.47-1.38)          | 2/35           | 0.17 (0.04-0.76)*        |

<sup>†</sup>Crude ORs; <sup>‡</sup> Age adjusted ORs; \*p<0.05.  
doi:10.1371/journal.pone.0021866.t003

type allele (additive model) but the trend was weaker for the recessive model.

#### TGFBR1 6A/9A polymorphism and risk for breast cancer

The distribution of genotype frequencies for the TGFBR1 6A/9A polymorphism in Maharashtrian healthy women was significantly different from that in Parsi healthy women (p = 0.006; Table 2). Maharashtrian patients and controls were characterized by the absence of TGFBR1\*6A homozygous individuals and comparable frequencies of TGFBR1 6A/9A genotypes. Risk assessment based on the observed genotype frequencies was inconclusive in Parsis as well as Maharashtrians (Table 5).

#### TGF β1 signaling strength in relation to the risk for breast cancer

Analysis of combinations of the TGFβ1 T29C and TGFBR1 6A/9A genotypes revealed significantly elevated frequency of low signalers in healthy Parsi women compared to their Maharashtrian counterparts (10.6% vs 3.2%; p<0.01; Table 6). The suggested increased risk for the disease in intermediate signalers among Maharashtrian women was not statistically significant (additive model, Table 6). In Parsi women, the intermediate and low signaling status conferred significantly higher risk for breast cancer with OR of 4.47 (CI, 1.01–19.69; p = 0.05) and 8.47 (CI 1.64–43.72; p = 0.01), respectively (Table 6). Higher risk for intermediate and low signalers was also seen for dominant as well as

**Table 4.** TGFβ1 T29C gene polymorphism and risk for breast cancer in Maharashtrian subjects with respect to the age of onset.

|                        | <40 yrs        |                          |                          | ≥40 yrs        |                          |                          |
|------------------------|----------------|--------------------------|--------------------------|----------------|--------------------------|--------------------------|
|                        | Cases/Controls | OR <sup>†</sup> (95% CI) | OR <sup>‡</sup> (95% CI) | Cases/Controls | OR <sup>†</sup> (95% CI) | OR <sup>‡</sup> (95% CI) |
| Genotype               |                |                          |                          |                |                          |                          |
| <b>TGFβ1 T29C</b>      |                |                          |                          |                |                          |                          |
| <i>Dominant Model</i>  |                |                          |                          |                |                          |                          |
| TT                     | 29/39          | 1                        | 1                        | 29/22          | 1                        | 1                        |
| TC/CC                  | 41/123         | 0.45 (0.25-0.81)**       | 0.50 (0.27-0.94)*        | 61/40          | 1.16 (0.58-2.29)         | 1.17 (0.59-2.32)         |
| <i>Additive Model</i>  |                |                          |                          |                |                          |                          |
| TT                     | 29/39          | 1                        | 1                        | 29/22          | 1                        | 1                        |
| TC                     | 30/79          | 0.51 (0.27-0.97)*        | 0.56 (0.28-1.11)         | 42/30          | 1.06 (0.51-2.19)         | 1.08 (0.52-2.23)         |
| CC                     | 11/44          | 0.34 (0.15-0.76)**       | 0.39 (0.16-0.92)*        | 19/10          | 1.44 (0.56-3.71)         | 1.44 (0.56-3.71)         |
| <i>Recessive Model</i> |                |                          |                          |                |                          |                          |
| TT/TC                  | 59/118         | 1                        | 1                        | 71/52          | 1                        | 1                        |
| CC                     | 11/44          | 0.5 (0.24-1.04)          | 0.55 (0.25-1.18)         | 19/10          | 1.39 (0.59-3.24)         | 1.38 (0.59-3.22)         |

<sup>†</sup>Crude ORs;  
<sup>‡</sup>Age adjusted ORs;  
\*p<0.05,  
\*\*p<0.01.  
doi:10.1371/journal.pone.0021866.t004

**Table 5.** TGFBR1 6A/9A polymorphism and risk for breast cancer in Maharashtrian and Parsi women.

|                        | Maharashtrian Subjects |                          |                          | Parsi Subjects |                          |
|------------------------|------------------------|--------------------------|--------------------------|----------------|--------------------------|
|                        | Cases/Controls         | OR <sup>†</sup> (95% CI) | OR <sup>‡</sup> (95% CI) | Cases/Controls | OR <sup>†</sup> (95% CI) |
| Genotype               |                        |                          |                          |                |                          |
| <b>TGFBR1 6A9A</b>     |                        |                          |                          |                |                          |
| <i>Dominant Model</i>  |                        |                          |                          |                |                          |
| 9A9A                   | 163/213                | 1                        | 1                        | 33/148         | 1                        |
| 9A9A/9A6A              | 4/9                    | 0.58 (0.18-1.92)         | 0.83 (0.23-3.0)          | 9/21           | 1.92 (0.81-4.57)         |
| <i>Additive Model</i>  |                        |                          |                          |                |                          |
| 9A9A                   | 163/213                | 1                        | 1                        | 33/148         | 1                        |
| 9A6A                   | 4/9                    | 0.58 (0.18-1.92)         | 0.83 (0.23-3.0)          | 8/19           | 1.89 (0.76-4.68)         |
| 6A6A                   | 0/0                    | -                        | -                        | 1/2            | 2.24 (0.19-25.47)        |
| <i>Recessive Model</i> |                        |                          |                          |                |                          |
| 9A9A/9A6A              | 167/222                | 1                        | 1                        | 41/167         | 1                        |
| 6A6A                   | 0/0                    | -                        | -                        | 1/2            | 2.04 (0.18-23.01)        |

<sup>†</sup>Crude ORs;  
<sup>‡</sup>Age adjusted ORs.  
 doi:10.1371/journal.pone.0021866.t005

recessive model but was statistically significant in the former case only.

**Discussion**

In Maharashtrian subjects, the observed frequencies for TGFBI T29C polymorphism were comparable to those reported in North Indian subjects [31]. Together these data reveal relatively higher frequency of TGFBI\*29C allele in western and northern Indians, as compared to those of European descent [4,7,8]. Conversely, another study in healthy subjects from South India [32] reporting allele and genotype frequencies similar to those reported in Whites might reflect extensive variation across ethnic groups, and thus

demands additional studies in diverse Indian population groups. The TGFBI\*29C allele frequency in Parsi controls was comparable to that observed in their ancestral neighbors, the Iranian controls (47% and 43%) as reported by two groups [41,42].

The strikingly lower frequency of TGFBR1\*6A allele in Maharashtrian women compared to that seen in Parsis [2.0% vs 6.8%, respectively; p<0.01; power=67%) is also in contrast to data from Whites, where the frequency of this allele varies between six and eleven percent [10]. Two studies in Chinese subjects have reported disparate frequencies of 6.2% [43] and 11% [44] for this allele. Thus the frequency of TGFBR1\*6A allele observed in Maharashtrian women in the present study is the lowest reported so far.

**Table 6.** Analysis of association between predicted TGF β signaling strength and risk for breast cancer.

|                            | Maharashtrian Subjects |                          |                          | Parsi Subjects |                          |
|----------------------------|------------------------|--------------------------|--------------------------|----------------|--------------------------|
|                            | Cases/Controls         | OR <sup>†</sup> (95% CI) | OR <sup>‡</sup> (95% CI) | Cases/Controls | OR <sup>†</sup> (95% CI) |
| Predicted Signaling Status |                        |                          |                          |                |                          |
| <i>Dominant Model</i>      |                        |                          |                          |                |                          |
| HS                         | 29/52                  | 1                        | 1                        | 2/32           | 1                        |
| IS + LS                    | 128/167                | 1.37 (0.83-2.29)         | 1.27 (0.74-2.2)          | 40/128         | 5 (1.15-21.79)*          |
| <i>Additive Model</i>      |                        |                          |                          |                |                          |
| HS                         | 29/52                  | 1                        | 1                        | 2/32           | 1                        |
| IS                         | 126/160                | 1.41 (0.85-2.35)         | 1.29 (0.75-2.24)         | 31/111         | 4.47 (1.01-19.69)*       |
| LS                         | 2/7                    | 0.51 (0.1-2.63)          | 0.66 (0.12-3.71)         | 9/17           | 8.47 (1.64-43.72)*       |
| <i>Recessive Model</i>     |                        |                          |                          |                |                          |
| HS + IS                    | 155/212                | 1                        | 1                        | 33/143         | 1                        |
| LS                         | 2/7                    | 0.39 (0.08-1.91)         | 0.54 (0.10-2.87)         | 9/17           | 2.29 (0.94-5.59)         |

<sup>†</sup>Crude ORs;  
<sup>‡</sup>Age adjusted ORs;  
 \*p≤0.05;  
 \*\*p≤0.01.  
 HS - High Signalers: CC/9A9A; IS - Intermediate Signalers: TT/9A9A, CC/9A6A, CC/6A6A or TC/9A9A;  
 LS - Low Signalers: TT/6A6A, TT/9A6A, TC/9A6A or TC/6A6A (Ref. 30).  
 doi:10.1371/journal.pone.0021866.t006

### Association of TGF β1 T29C and TGFBR1 6A/9A polymorphisms with breast cancer risk

Our findings in Maharashtrian premenopausal women suggest an association between the presence of *TGFBR1\*29C* allele (45% power), and a reduced risk for the disease especially in the younger age group (<40 yrs; 72% power). These observations are in direct contrast with those from the Breast Cancer Association Consortium [4], a multicentric study that predominantly included subjects of European descent from different continents. On the other hand, our findings concur with the observations in premenopausal Japanese women and in American women [27,30]. The protection conferred by higher frequency of this allele associated with higher TGF β production would be compatible with its ability to suppress development of mammary tumors [10]. The possible contribution of low frequency of the *TGFBR1\*6A* allele to the observed effect of the *TGFBR1\*29C* allele on the risk for the disease in Maharashtrian women cannot be ruled out.

An attempt was also made to analyse the association of *TGFBR1* T29C genotypes with hormone receptor status in Maharashtrian patients. Of the one hundred and twenty two patients where the information was available, the hormone receptor negative tumor bearing subjects were characterized by a strikingly lower frequency of *TGFBR1\*CC* genotype compared to the hormone receptor positive group (8 of 64 vs 10 of 40; Table S1). Thus a trend towards an association between lower frequency of hormone receptor negative tumors and *TGFBR1\*CC* genotype was suggested ( $p < 0.05$ ; Fig S1). Similar findings have been reported by Kaklamani et al. [30] in a cohort that included patients from all age groups.

The associations seen in our study however must be viewed with caution in view of the inadequate power of our study (Table 3 & 4). The data from the Breast Cancer Association Consortium that comprised of nearly thirteen thousand cases and fifteen thousand controls revealed a 16% increased risk for rare homozygotes with nearly 100% power [4]. The frequency of the minor allele for *TGFBR1\*29C* polymorphism varies from 38% to 44% in the majority of populations across the world [9]. Thus, for the dominant model, over three thousand patients and a similar number of healthy controls would have to be studied in order to detect a 15% increase in associated risk with adequate power (80% at  $\alpha = 0.05$ ) and, for the recessive model, over five thousand patients and controls would have to be studied. Similarly, for an equivalent increase in risk associated with *TGFBR1\*6A* allele (frequency 10%) with adequate power, sixteen thousand (dominant model) and forty six thousand (recessive model) patients and controls would have to be studied [40]. Accordingly, for *TGFBR1\*29C* polymorphism with the observed allele frequencies in the western Indian population, to detect a 15% change in the risk for breast cancer, nearly four thousand patients and an equal number of healthy controls would be needed to achieve a power of 80% (at  $\alpha = 0.05$ ). Similar computations for *TGFBR1\*6A* allele indicate that for a fifteen percent increment in the risk for breast cancer [10] due to presence of this allele, nearly twenty thousand patients and controls would be needed whereas, to determine its effect recessively, over a million subjects would be needed. In view of these considerations, the possibility that the observed association in our study of western Indian women is a false positive result cannot be ruled out.

### TGF β1 signaling status and risk for breast cancer

An important consequence of the relatively higher frequency of *TGFBR1\*29C* allele and lower frequency of *TGFBR1\*6A* allele in healthy Maharashtrian women was revealed when combinations of these genotypes were analyzed. Categorization of individuals into low, moderate and high TGF β1 signalers based on an

approach described by Kaklamani et al [30], revealed strikingly lower frequency of low signalers in healthy Maharashtrian women compared to that in Parsi women (3.2% vs 10.6%;  $p < 0.01$ ). A comparison of the frequencies of high, intermediate and low signalers among healthy subjects reported in literature (Fig 1) indicates that the frequency of low signalers is strikingly reduced in women from western India.

In view of the small numbers of patients studied from the Parsi community, the observed high risk (OR >4) for breast cancer indicated for low and intermediate ( $p = 0.01$  and  $p = 0.05$ , respectively; Table 6) signalers in these subjects warrants a note of caution. The observation may reflect the high degree of genetic homogeneity [36] and/or an ethnicity-specific effect [45]. Parsis have been known to marry within the community for over the past few centuries and may have experienced a genetic bottleneck following their arrival in Indian seven hundred years ago [35].

### Basis for the prevalence of TGF β signaling mediated inhibition in Maharashtrian women and its implications

Several lines of evidence prompt us to suggest that the distinct trends in genotype and allele frequencies of the two polymorphisms in Maharashtrians may reflect the effect of environmental forces. A higher frequency of genotypes contributing to elevated pro-inflammatory responses has been reported in populations from tropical regions [46,47]. Commensurate with these observations, Asians are characterized by higher levels of markers associated with chronic inflammation as well as IgG1 levels, as compared to Whites [48,49]. In view of the significant contribution of inflammation to the initiation and progression of malignancies [50], these features may also contribute to an overall earlier age of onset of malignant disorders in the region [51]. The prevalence of TGF β mediated inhibition in Maharashtrian subjects revealed in this study may have emerged as a counteracting force to the selection of the pro-inflammatory genotypes to minimize the risk of autoimmunity [52]. This in turn could also suppress the development of malignancies by virtue of its anti-proliferative effects on the mammary epithelial cells [21]. Thus, the effects of higher frequency of *TGFBR1\*29C* allele, alone and in association

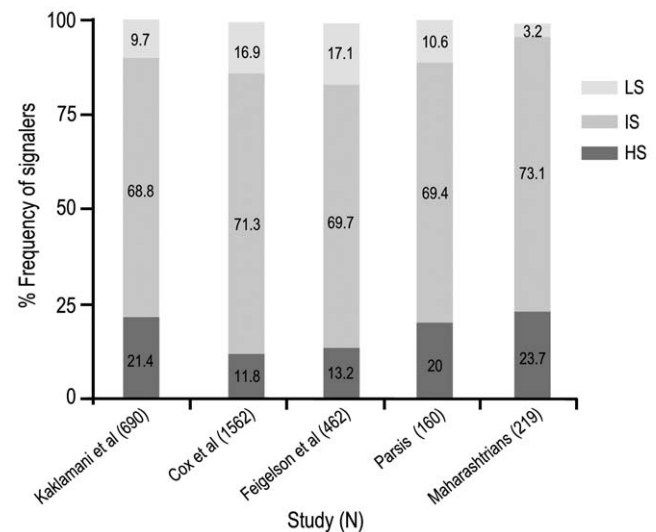

**Figure 1. Comparison of frequencies of High, Intermediate and Low signalers in various studies reported so far.** Numbers in parentheses represent the number of healthy subjects studied in each report.

doi:10.1371/journal.pone.0021866.g001



with the lower frequency of *TGFBR1\*6A* allele, may have implications for the lower incidence of breast cancer in this population.

The large body of data supporting the association of *TGFBI* T29C and *TGFBR1* 6A/9A polymorphisms with the risk for breast cancer provides a strong basis to endorse the view that the combinations of genotypes resulting in weak TGF β signaling would have a greater impact on the risk for the disease - although the findings of epidemiological studies in this context remain equivocal [24,25,30]. Therefore, the population attributable risk associated with such genotype combinations or their contribution to the total disease burden, a function of frequency and penetrance also remains unresolved. Our results implicate *TGFBI\*29C* genotype in modulating the risk for breast cancer in western Indian women. Further this population is characterized by a lower frequency of *TGFBR1\*6A* allele. These observations, and the predicted influence of the combination of genotypes of the two polymorphisms studied, permit us to argue that three-fold lower frequency of low signalers may represent one of the mechanisms that would contribute to the reduced risk for breast cancer in Maharashtrian women compared to Parsis or Whites, a possibility that would be commensurate with the known difference in breast cancer incidence rates between the Indians and Whites [53].

In summary, the present study on *TGFBI* T29C and *TGFBR1* 6A/9A polymorphisms in relation to breast cancer risk has revealed important differences between the genotypes and allele frequencies in premenopausal Maharashtrian women, compared to Parsi and White women. These may have implications for the lower risk for the disease in Maharashtrian women. Available data supports the possibility of environmental influence as one of the driving forces giving rise to such an ethnicity-specific genetic variation [46,47]. The influence of high TGF β1 producing

genotype (*TGFBI\*CC*) in western Indian women suggested by our study and in White women by others [4], despite opposite trends, points towards its considerable penetrance. The trends revealed in the present study raise a number of important possibilities and stress need for a larger study coupled with the assessment of clinical data. Such a study could also provide a valuable prognostic parameter, especially in the context of earlier age of onset and prevalence of an aggressive disease in Indian patients.

## Supporting Information

**Figure S1 Analysis of association of *TGFBI* T29C genotypes with hormone receptor status in Maharashtrian subjects.** OR – Age adjusted odds ratios with 95% CI; n = 224; \*\*p<0.01; \*p = 0.05 for *TGFBI\*CC* genotype. (TIF)

**Table S1 Distribution of various *TGFBI* T29C genotypes with respect to ER/PR status.** (DOC)

## Acknowledgments

The authors would like to thank Dr. K. A. Dinshaw, former Director, Tata Memorial Centre (TMC), Mumbai, Dr. R. A. Badwe, Director, TMC, Mumbai, and Dr. R. Sarin, Director, ACTREC, TMC, Navi Mumbai, for their support in recruiting study subjects. Editorial assistance provided by Dr. Aparna Bagwe, ACTREC, TMC, is gratefully acknowledged.

## Author Contributions

Conceived and designed the experiments: NNJ. Performed the experiments: MDK SSH. Analyzed the data: NNJ MDK SK. Contributed reagents/materials/analysis tools: NNJ SSH SK. Wrote the paper: NNJ.

## References

- Rahman N, Stratton MR (1998) The genetics of breast cancer susceptibility. *Annu Rev Genet* 32: 95–121.
- Lichtenstein P, Holm NV, Verkasalo PK, Iliadou A, Kaprio J, et al. (2000) Environmental and heritable factors in the causation of cancer—analyses of cohorts of twins from Sweden, Denmark, and Finland. *N Engl J Med* 343: 78–85.
- Amundadottir LT, Thorvaldsson S, Gudbjartsson DF, Sulem P, Kristjansson K, et al. (2004) Cancer as a complex phenotype: pattern of cancer distribution within and beyond the nuclear family. *PLoS Med* 1: e65.
- Cox A, Dunning AM, Garcia-Closas M, Balasubramanian S, Reed MW, et al. (2007) A common coding variant in *CASP8* is associated with breast cancer risk. *Nat Genet* 39: 352–358.
- Turnbull C, Ahmed S, Morrison J, Pernet D, Renwick A, et al. (2010) Genome-wide association study identifies five new breast cancer susceptibility loci. *Nat Genet* 42: 504–507.
- Pharoah PD, Antoniou AC, Easton DF, Ponder BA (2008) Polygenes, risk prediction, and targeted prevention of breast cancer. *N Engl J Med* 358: 2796–2803.
- Ma X, Chen C, Xiong H, Li Y (2010) Transforming growth factorβ1 L10P variant plays an active role on the breast cancer susceptibility in Caucasian: evidence from 10,392 cases and 11,697 controls. *Breast Cancer Res Treat* 124: 453–457.
- Qiu LX, Yao L, Mao C, Chen B, Zhan P, et al. (2010) TGFβ1 L10P polymorphism is associated with breast cancer susceptibility: evidence from a meta-analysis involving 47,817 subjects. *Breast Cancer Res Treat* 123: 563–567.
- Liao RY, Mao C, Qiu LX, Ding H, Chen Q, et al. (2010) TGFβ1\*6A/9A polymorphism and cancer risk: a meta-analysis of 13,662 cases and 14,147 controls. *Mol Biol Rep* 37: 3227–3232.
- Pierce DF, Jr., Gorska AE, Chytil A, Meise KS, Page DL, et al. (1995) Mammary tumor suppression by transforming growth factor beta 1 transgene expression. *Proc Natl Acad Sci U S A* 92: 4254–4258.
- Muraoka-Cook RS, Kurokawa H, Koh Y, Forbes JT, Roebuck LR, et al. (2004) Conditional overexpression of active transforming growth factor beta1 in vivo accelerates metastases of transgenic mammary tumors. *Cancer Res* 64: 9002–9011.
- Markowitz SD, Roberts AB (1996) Tumor suppressor activity of the TGF-beta pathway in human cancers. *Cytokine Growth Factor Rev* 7: 93–102.
- Pasche B, Knobloch TJ, Bian Y, Liu J, Phukan S, et al. (2005) Somatic acquisition and signaling of TGFβ1\*6A in cancer. *JAMA* 294: 1634–1646.
- Desruisseau S, Palmari J, Giusti C, Romain S, Martin PM, et al. (2006) Determination of TGFβ1 protein level in human primary breast cancers and its relationship with survival. *Br J Cancer* 94: 239–246.
- Papadopoulou E, Anagnostopoulos K, Tripsianis G, Tentis I, Kakolyris S, et al. (2008) Evaluation of predictive and prognostic significance of serum TGF-β1 levels in breast cancer according to HER-2 codon 655 polymorphism. *Neoplasma* 55: 229–238.
- Dunning AM, Ellis PD, McBride S, Kirschenlohr HL, Healey CS, et al. (2003) A transforming growth factorβ1 signal peptide variant increases secretion in vitro and is associated with increased incidence of invasive breast cancer. *Cancer Res* 63: 2610–2615.
- Pasche B, Luo Y, Rao PH, Nimer SD, Dmitrovsky E, et al. (1998) Type I transforming growth factor beta receptor maps to 9q22 and exhibits a polymorphism and a rare variant within a polyalanine tract. *Cancer Res* 58: 2727–2732.
- Pasche B, Kolachana P, Nafa K, Satagopan J, Chen YG, et al. (1999) TGFβ1R-I(6A) is a candidate tumor susceptibility allele. *Cancer Res* 59: 5678–5682.
- Schirmer MA, Hoffmann AO, Campean R, Janke JH, Zidek LM, et al. (2009) Bioinformatic and functional analysis of TGFβ1 polymorphisms. *Pharmacogenomics* 19: 249–259.
- Rosman DS, Phukan S, Huang CC, Pasche B (2008) TGFβ1\*6A enhances the migration and invasion of MCF-7 breast cancer cells through RhoA activation. *Cancer Res* 68: 1319–1328.
- Berie B, Moses HL (2006) Tumour microenvironment: TGFβ: the molecular Jekyll and Hyde of cancer. *Nat Rev Cancer* 6: 506–520.
- Krippel P, Langsenlehner U, Renner W, Yazdani-Biuki B, Wolf G, et al. (2003) The L10P polymorphism of the transforming growth factor-beta 1 gene is not associated with breast cancer risk. *Cancer Lett* 201: 181–184.
- Le Marchand L, Haiman CA, van den Berg D, Wilkens LR, Kolonel LN, et al. (2004) T29C polymorphism in the transforming growth factor beta1 gene and postmenopausal breast cancer risk: the multiethnic cohort study. *Cancer Epidemiol Biomarkers Prev* 13: 412–415.
- Feigelson HS, Patel AV, Diver WR, Stevens VL, Thun MJ, et al. (2006) Transforming growth factor beta receptor type I and transforming growth factor

- beta1 polymorphisms are not associated with postmenopausal breast cancer. *Cancer Epidemiol Biomarkers Prev* 15: 1236–1237.
25. Cox DG, Penney K, Guo Q, Hankinson SE, Hunter DJ (2007) TGFβ1 and TGFBR1 polymorphisms and breast cancer risk in the Nurses' Health Study. *BMC Cancer* 7: 175.
  26. Ziv E, Cauley J, Morin PA, Saiz R, Browner WS (2001) Association between the T29->C polymorphism in the transforming growth factor beta1 gene and breast cancer among elderly white women: the study of osteoporotic fractures. *JAMA* 285: 2859–2863.
  27. Hishida A, Iwata H, Hamajima N, Matsuo K, Mizutani M, et al. (2003) Transforming growth factor B1 T29C polymorphism and breast cancer risk in Japanese women. *Breast Cancer* 10: 63–69.
  28. Baxter SW, Choong DY, Eccles DM, Campbell IG (2002) Transforming growth factor beta receptor 1 polyalanine polymorphism and exon 5 mutation analysis in breast and ovarian cancer. *Cancer Epidemiol Biomarkers Prev* 11: 211–214.
  29. Collieran G, McInerney N, Rowan A, Barclay E, Jones AM, et al. (2010) The TGFBR1\*6A/9A polymorphism is not associated with differential risk of breast cancer. *Breast Cancer Res Treat* 119: 437–442.
  30. Kaklamani VG, Baddi L, Liu J, Rosman D, Phukan S, et al. (2005) Combined genetic assessment of transforming growth factor-beta signaling pathway variants may predict breast cancer risk. *Cancer Res* 65: 3454–3461.
  31. Kaur G, Rappaport CC, Kumar N, Kumar S, Neolia S, et al. (2007) Frequency distribution of cytokine gene polymorphisms in the healthy North Indian population. *Tissue Antigens* 69: 113–120.
  32. Rajkumar T, Samson M, Rama R, Sridevi V, Mahji U, et al. (2008) TGFβ1 (Leu10Pro), p53 (Arg72Pro) can predict for increased risk for breast cancer in south Indian women and TGFβ1 Pro (Leu10Pro) allele predicts response to neo-adjuvant chemo-radiotherapy. *Breast Cancer Res Treat* 112: 81–87.
  33. Yeole BB, Kurkure AP (2003) An epidemiological assessment of increasing incidence and trends in breast cancer in Mumbai and other sites in India, during the last two decades. *Asian Pac J Cancer Prev* 4: 51–56.
  34. Kakarala M, Rozek L, Cote M, Liyanage S, Brenner DE (2010) Breast cancer histology and receptor status characterization in Asian Indian and Pakistani women in the U.S.-a SEER analysis. *BMC Cancer* 10: 191.
  35. Nanavutty P (1997) *The Parsis*. New Delhi: National Book Trust.
  36. Bonnen PE, Pe'er I, Plenge RM, Salit J, Lowe JK, et al. (2006) Evaluating potential for whole-genome studies in Kosrae, an isolated population in Micronesia. *Nat Genet* 38: 214–217.
  37. Yeole BB, Kurkure A, Advani S, Lizzy S (2001) An assessment of cancer incidence patterns in Parsi and non Parsi populations, Greater Mumbai. *Asian Pac J Cancer Prev* 2: 293–298.
  38. Kulkarni S, Single RM, Martin MP, Rajalingam R, Badwe R, et al. (2008) Comparison of the rapidly evolving KIR locus in Parsis and natives of India. *Immunogenetics* 60: 121–129.
  39. Perrey C, Turner SJ, Pravica V, Howell WM, Hutchinson IV (1999) ARMS-PCR methodologies to determine IL-10, TNF-alpha, TNF-beta and TGF-beta 1 gene polymorphisms. *Transpl Immunol* 7: 127–128.
  40. Gauderman WJ M (2006) Quanto 1.1: a computer program for power and sample size calculations for genetic-epidemiology studies. <http://hydra.usc.edu/gxe>.
  41. Khalilzadeh O, Anvari M, Momen-Heravi F, Esteghamati A, Rashidi A, et al. (2010) Gene polymorphisms of interleukin-4, interleukin-10 and transforming growth factor-beta in Graves' disease. *Clin Exp Med* 10: 123–128.
  42. Taherkhani H, Hajilooi M, Fallah M, Khyabanchi O, Haidari M (2009) Gene polymorphism in transforming growth factor-beta codon 10 is associated with susceptibility to Giardiasis. *Int J Immunogenet* 36: 345–349.
  43. You W, Liu Z, Zhao J, Zheng M, Zheng SY, et al. (2007) No association between TGFBR1\*6A and lung cancer. *J Thorac Oncol* 2: 657–659.
  44. Hu YS, Pan Y, Li WH, Zhang Y, Li J, et al. (2010) Association between TGFBR1\*6A and osteosarcoma: a Chinese case-control study. *BMC Cancer* 10: 169.
  45. Battle NC, Choudhry S, Tsai HJ, Eng C, Kumar G, et al. (2007) Ethnicity-specific gene-gene interaction between IL-13 and IL-4Ralpha among African Americans with asthma. *Am J Respir Crit Care Med* 175: 881–887.
  46. Le Souef PN, Goldblatt J, Lynch NR (2000) Evolutionary adaptation of inflammatory immune responses in human beings. *Lancet* 356: 242–244.
  47. Blackwell CC, Moscovis SM, Gordon AE, Al Madani OM, Hall ST, et al. (2005) Cytokine responses and sudden infant death syndrome: genetic, developmental, and environmental risk factors. *J Leukoc Biol* 78: 1242–1254.
  48. Chandalia M, Cabo-Chan AV, Jr., Devaraj S, Jialal I, Grundy SM, et al. (2003) Elevated plasma high-sensitivity C-reactive protein concentrations in Asian Indians living in the United States. *J Clin Endocrinol Metab* 88: 3773–3776.
  49. Fischbacher CM, Bhopal R, Blackwell CC, Ingram R, Unwin NC, et al. (2003) IgG is higher in South Asians than Europeans: does infection contribute to ethnic variation in cardiovascular disease? *Arterioscler Thromb Vasc Biol* 23: 703–704.
  50. Balkwill F, Charles KA, Mantovani A (2005) Smoldering and polarized inflammation in the initiation and promotion of malignant disease. *Cancer Cell* 7: 211–217.
  51. Sastry PS, Parikh P (2003) The earlier age of onset of malignancy in developing world is related to overall infection burden and could be due to the effect on telomere length. *Med Hypotheses* 60: 573–574.
  52. Rubtsov YP, Rudensky AY (2007) TGFβ signaling in control of T-cell-mediated self-reactivity. *Nat Rev Immunol* 7: 443–453.
  53. Notani P (2001) Global variation in cancer incidence and mortality. *Current Science* 81: 465–474.
